# Supplementary material for: Tailoring lignin nanoparticle properties: the effects of pH and salt on shape and antioxidant capacity
Source: Royal Society of Chemistry journal article supplement (doi:10.1039/d3su00380a), 2024-01-01
Supplement: d3su00380a1.pdf [file d3su00380a1.pdf]

## **Tailoring lignin nanoparticle properties: The effects of pH and salt on shape and antioxidant capacity**

Natalia Obrzut<sup>a</sup>, Rob Hickmott<sup>a</sup>, Kimberly Gray<sup>a†</sup>

<sup>a</sup> Department of Civil and Environmental Engineering, Northwestern University, 2145 Sheridan Road, Evanston, Illinois 60208, United States

† Corresponding author: [k-gray@northwestern.edu](mailto:k-gray@northwestern.edu)

Number of Pages: 6

Number of Figures: 1

Number of Tables: 2

## List of Figures

|                                                                                                                                                                                                                                                                                                                                                                                                                                 |   |
|---------------------------------------------------------------------------------------------------------------------------------------------------------------------------------------------------------------------------------------------------------------------------------------------------------------------------------------------------------------------------------------------------------------------------------|---|
| Figure S1. EDS spectra data for values in Table 2 in the manuscript. Spectra was taken with the Oxford Ultimex 65 accessory on the SEM. The spectra was analyzed with Aztec Live to determine the weight percent of the compounds. ....                                                                                                                                                                                         | 5 |
| Figure S2. SEM image of dialyzed carbonate LNPs, we see that the flower-like micelle is intact. .                                                                                                                                                                                                                                                                                                                               | 6 |
| Figure S3. Ionic strength effects for phosphate salt in basic and neutral conditions. Ionic strength was modified with changes to the concentration. The gray arrow indicates what the expected trend is and the orange line indicates the observed trend. We see that the expected and observed trends are not in agreement, indicating that the ionic strength is not responsible for the differences in LNP properties. .... | 7 |

## List of Tables

|                                                                                                                                                                                                                                                                                                                                                                                                        |    |
|--------------------------------------------------------------------------------------------------------------------------------------------------------------------------------------------------------------------------------------------------------------------------------------------------------------------------------------------------------------------------------------------------------|----|
| Table S1. Anion and pH of a 220 mM salt solution at day 7 at basic, neutral, and acidic pH. We see overall solubilization as measured by uv-vis and calibrated with completely dissolved lignin at pH 14. LNP concentration is determined through NTA, using methods described in the manuscript. We see nearly complete dissolution of lignin in most solutions and a high conversion into LNPs. .... | 8  |
| Table S2. Summary of the experiments that were performed in this section. This includes the naming convention (label) which subsequent figures use, the salt type, the day of measurement, the concentration, the pH, and the ionic strength.....                                                                                                                                                      | 9  |
| Table S3. The correction values for the absorbances due to the effect of phosphate and carbonate at basic pH.....                                                                                                                                                                                                                                                                                      | 10 |

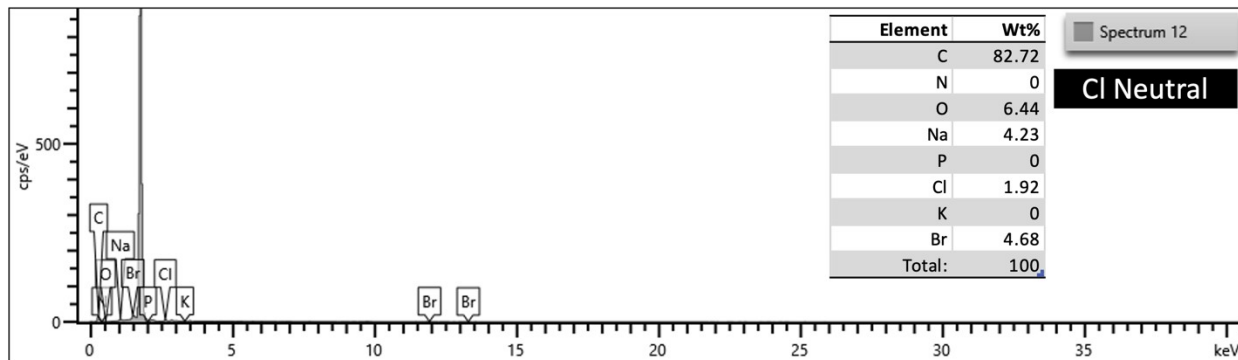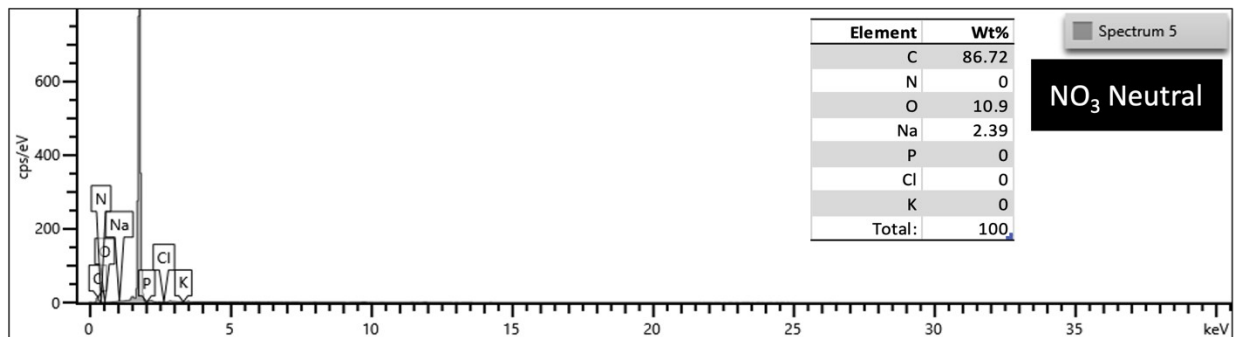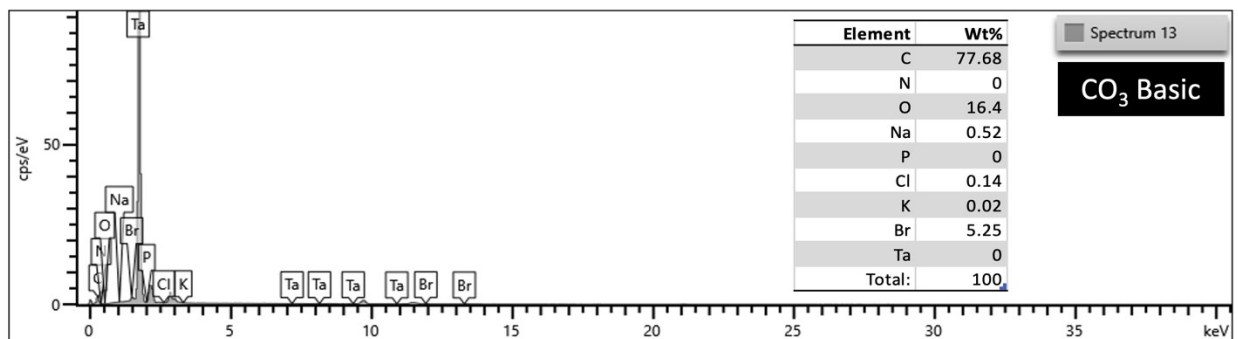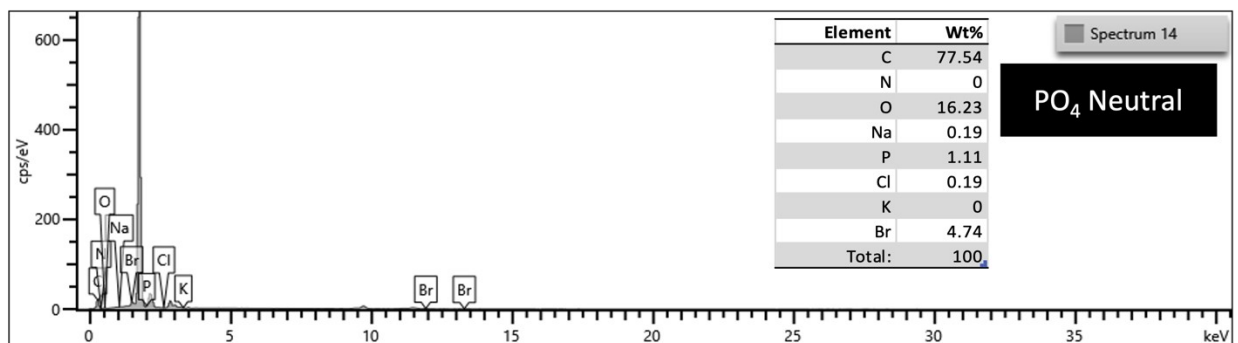

Figure S1. EDS spectra data for values in Table 2 in the manuscript. Spectra was taken with the Oxford Ultimix 65 accessory on the SEM. The spectra was analyzed with Aztec Live to determine the weight percent of the compounds.

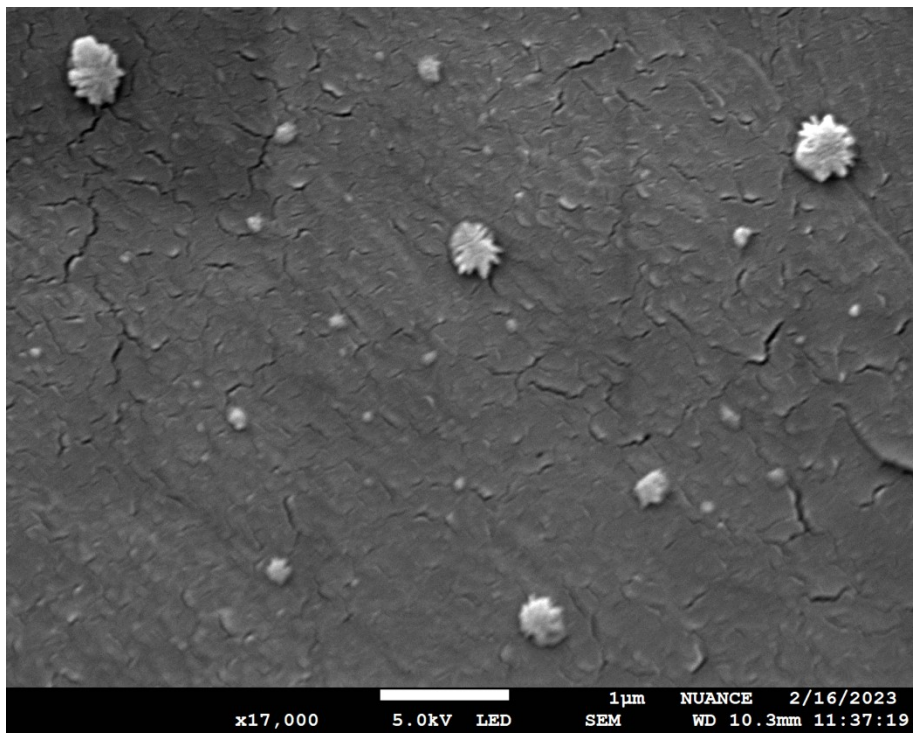

Figure S2. SEM image of dialyzed carbonate LNPs, we see that the flower-like micelle is intact.

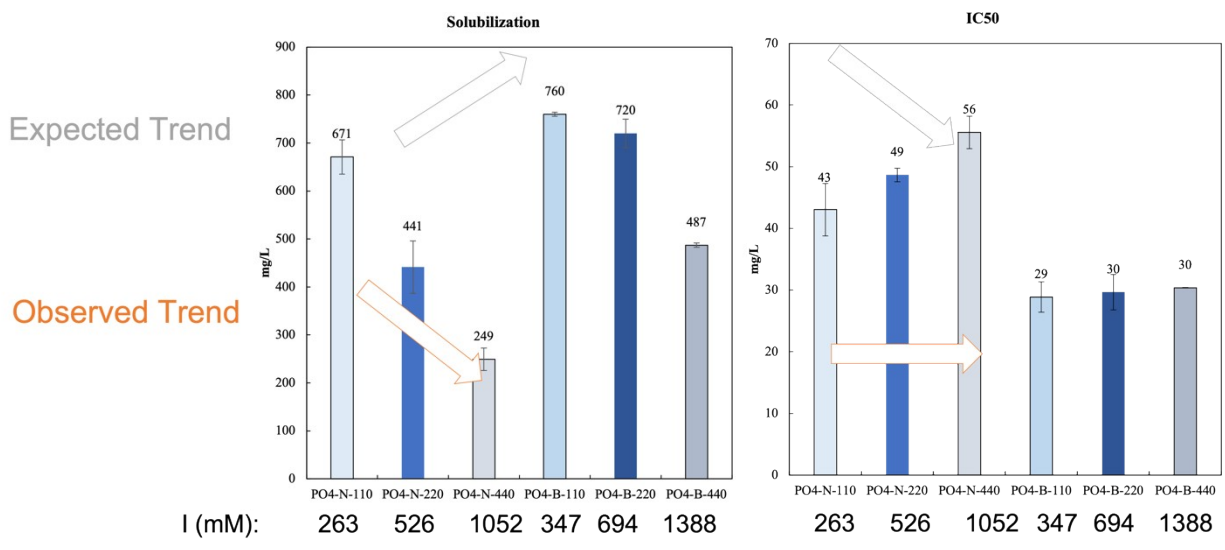

Figure S3. Ionic strength effects for phosphate salt in basic and neutral conditions. Ionic strength was modified with changes to the concentration. The gray arrow indicates what the expected trend is and the orange line indicates the observed trend. We see that the expected and observed trends are not in agreement, indicating that the ionic strength is not responsible for the differences in LNP properties.

*Table S1. Anion and pH of a 220 mM salt solution at day 7 at basic, neutral, and acidic pH. We see overall solubilization as measured by uv-vis and calibrated with completely dissolved lignin at pH 14. LNP concentration is determined through NTA, using methods described in the manuscript. We see nearly complete dissolution of lignin in most solutions and a high conversion into LNPs.*

| Anion | pH      | Sol (mg/L) | LNP (mg/L) | Sol SE | LNP SE |
|-------|---------|------------|------------|--------|--------|
| Cl    | Basic   | 1080.7     | 245.0      | 98.0   | 32.5   |
| Cl    | Neutral | 948.7      | 515.8      | 66.4   | 47.0   |
| NO3   | Basic   | 1075.0     | 252.4      | 100.6  | 17.5   |
| NO3   | Neutral | 952.5      | 328.9      | 125.6  | 21.6   |
| NO3   | Acidic  | 1028.3     | 409.1      | 79.2   | 31.5   |
| CO3   | Basic   | 1170.9     | 156.3      | 202.3  | 21.9   |
| CO3   | Neutral | 895.4      | 354.8      | 54.9   | 17.0   |
| PO4   | Basic   | 998.9      | 445.5      | 63.0   | 1.1    |
| PO4   | Neutral | 428.8      | 879.1      | 2.9    | 1.6    |
| PO4   | Acidic  | 96.8       | 272.3      | 2.2    | 62.4   |

Table S2. Summary of the experiments that were performed in this section. This includes the naming convention (label) which subsequent figures use, the salt type, the day of measurement, the concentration, the pH, and the ionic strength.

| Label       | Salt                                                    | Day | Conc (M) | pH   | Ionic Strength (M) |
|-------------|---------------------------------------------------------|-----|----------|------|--------------------|
| Cl-B        | Sodium Chloride                                         | 0   | 0.220    | 10.8 | 0.220              |
| Cl-B-7      | Sodium Chloride                                         | 7   | 0.220    | 10.8 | 0.220              |
| Cl-N        | Sodium Chloride                                         | 0   | 0.220    | 7    | 0.220              |
| Cl-N-7      | Sodium Chloride                                         | 7   | 0.220    | 7    | 0.220              |
| NO3-B       | Sodium Nitrate                                          | 0   | 0.220    | 10.8 | 0.220              |
| NO3-B-7     | Sodium Nitrate                                          | 7   | 0.220    | 10.8 | 0.220              |
| NO3-N       | Sodium Nitrate                                          | 0   | 0.220    | 7    | 0.220              |
| NO3-N-7     | Sodium Nitrate                                          | 7   | 0.220    | 7    | 0.220              |
| NO3-A       | Sodium Nitrate                                          | 0   | 0.220    | 3.8  | 0.220              |
| NO3-A-7     | Sodium Nitrate                                          | 7   | 0.220    | 3.8  | 0.220              |
| CO3-B       | Sodium Carbonate/ Sodium Bicarbonate                    | 0   | 0.220    | 10.8 | 0.529              |
| CO3-B-7     | Sodium Carbonate/ Sodium Bicarbonate                    | 7   | 0.220    | 10.8 | 0.529              |
| CO3-N       | Sodium Carbonate/ Sodium Bicarbonate                    | 0   | 0.220    | 7    | 0.185              |
| CO3-N-7     | Sodium Carbonate/ Sodium Bicarbonate                    | 7   | 0.220    | 7    | 0.185              |
| PO4-B       | Potassium Phosphate Monobasic/ Sodium Phosphate Dibasic | 0   | 0.220    | 10.8 | 0.694              |
| PO4-B-7     | Potassium Phosphate Monobasic/ Sodium Phosphate Dibasic | 7   | 0.220    | 10.8 | 0.694              |
| PO4-N       | Potassium Phosphate Monobasic/ Sodium Phosphate Dibasic | 0   | 0.220    | 7    | 0.526              |
| PO4-N-7     | Potassium Phosphate Monobasic/ Sodium Phosphate Dibasic | 7   | 0.220    | 7    | 0.526              |
| PO4-A       | Potassium Phosphate Monobasic/ Sodium Phosphate Dibasic | 0   | 0.220    | 3.8  | 0.222              |
| PO4-A-7     | Potassium Phosphate Monobasic/ Sodium Phosphate Dibasic | 7   | 0.220    | 3.8  | 0.222              |
| PO4-B-110   | Potassium Phosphate Monobasic/ Sodium Phosphate Dibasic | 0   | 0.110    | 10.8 | 0.347              |
| PO4-B-110-7 | Potassium Phosphate Monobasic/ Sodium Phosphate Dibasic | 7   | 0.110    | 10.8 | 0.347              |
| PO4-N-110   | Potassium Phosphate Monobasic/ Sodium Phosphate Dibasic | 0   | 0.110    | 7    | 0.263              |
| PO4-N-110-7 | Potassium Phosphate Monobasic/ Sodium Phosphate Dibasic | 7   | 0.110    | 7    | 0.263              |
| PO4-B-440   | Potassium Phosphate Monobasic/ Sodium Phosphate Dibasic | 0   | 0.440    | 10.8 | 1.388              |
| PO4-B-440-7 | Potassium Phosphate Monobasic/ Sodium Phosphate Dibasic | 7   | 0.440    | 10.8 | 1.388              |
| PO4-N-440   | Potassium Phosphate Monobasic/ Sodium Phosphate Dibasic | 0   | 0.440    | 7    | 1.052              |
| PO4-N-440-7 | Potassium Phosphate Monobasic/ Sodium Phosphate Dibasic | 7   | 0.440    | 7    | 1.052              |



Table S3. The correction values for the absorbances due to the effect of phosphate and carbonate at basic pH.

| Phosphate (Basic) |                       | Carbonate (Basic) |                       |
|-------------------|-----------------------|-------------------|-----------------------|
| Concentration     | Absorbance Correction | Concentration     | Absorbance Correction |
| Between 0-20 mg/L | 0                     | 2 mg/L            | 0.041                 |
| 40 mg/L           | 0.054                 | 6 mg/L            | 0.076                 |
| 60 mg/L           | 0.115                 | 10 mg/L           | 0.137                 |
| 80 mg/L           | 0.141                 | 14 mg/L           | 0.186                 |
| 100 mg/L          | 0.223                 | 16 mg/L           | 0.204                 |
| 140 mg/L          | 0.278                 | 18 mg/L           | 0.225                 |
| 160 mg/L          | 0.31                  | 20 mg/L           | 0.227                 |
| Over 200 mg/L     | 0.405                 | 40 mg/L           | 0.326                 |
|                   |                       | Over 60 mg/L      | 0.441                 |
